# Supplementary material for: Genome-Wide Investigation of the PLD Gene Family in Tomato: Identification, Analysis, and Expression
Source: MDPI journal article supplement (doi:10.3390/genes15030326), 2024-03-02
Supplement: s1 [file Table S1.xlsx]

## Sheet: Sheet1
Table S1. Sequences of primers used in qRT-PCR analysis
Primer name	Sequence (5' to 3')
SlPLDα1-F	AGTCAGAGACGAGGAGGCTT
SlPLDα1-R	AGGCCCTCCTTTGTCAATCG
SlPLDα2-F	AGAAAGCAGGGAGGGAAGGA
SlPLDα2-R	TTCCCACTGACAAGACCAGC
SlPLDα3-F	TGGAAAAGCCAGAGTTGGCA
SlPLDα3-R	CCATCTAGCAGTTGTTGTACTGG
SlPLDα4-F	ATTCCTCTTGCTGGTGGCAA
SlPLDα4-R	CTCCCCGAGCGTTATGTCTC
SlPLDα5-F	CGTCCAACGGAAGTTACAGC
SlPLDα5-R	CAGGGAAGTCGGTAACAGCA
SlPLDβ1-F	CTTTGACGCCATACGCCAAG
SlPLDβ1-R	AAGATCCCCGAGAGTGCAAC
SlPLDβ2-F	TGGCTTTTGTTGGGGGACTT
SlPLDβ2-R	GCCCGTGTAGTTAGGCTGAT
SlPLDβ3-F	GACTATGGGATGACGCAGCA
SlPLDβ3-R	ATGCCACACTGACCATCCAG
SlPLDδ1-F	CCGTTGCTTCACTTTCGGTG
SlPLDδ1-R	CGGTTTGTGGAGCTGAAACG
SlPLDδ2-F	CACGACGAGGAAACCAGGAA
SlPLDδ2-R	TGCCTGCGTATCAACCAGAA
SlPLDδ3-F	TCATCCGTCAACTGTGTGCT
SlPLDδ3-R	CGCCAAGGAAAGCTGAAACC
SlPLDδ4-F	TGGGGTAGGAGCTGAACTGA
SlPLDδ4-R	TCAGAGGATCCCCGGAATGT
SlPLDζ1-F	CCCAAGAGAATCCGAGCCAA
SlPLDζ1-R	TTGAACGAAGTGTCTGGCGA
SlPLDζ2-F	GCCCGAGTATGGTCCTAAGC
SlPLDζ2-R	AGCAACCGAACCACTGACAT
β-Actin-F	AGCAGGAACTTGAAACCGCT
β-Actin-R	CTCATGGATACCCGCAGCTT
