# Supplementary material for: Genome-Wide Investigation of the PLD Gene Family in Tomato: Identification, Analysis, and Expression
Source: MDPI journal article supplement (doi:10.3390/genes15030326), 2024-03-02
Supplement: s1 [file Table S2.xlsx]

## Sheet: Sheet1
Table S2. Syntenic gene pairs between Solanum lycopersicum and Arabidopsis thaliana.
Gene Name	Gene ID of Solanum lycopersicum	Gene Name	Gene ID of Arabidopsis thaliana
SlPLDα2	Solyc06g068090	AtPLDα2	AT1G52570
SlPLDα2	Solyc06g068090	AtPLDα1	AT3G15730
SlPLDα2	Solyc06g068090	AtPLDα3	AT5G25370
SlPLDβ2	Solyc08g080130	AtPLDγ2	AT4G11830
SlPLDα1	Solyc03g116620	AtPLDα2	AT1G52570
SlPLDα1	Solyc03g116620	AtPLDα1	AT3G15730
SlPLDδ1	Solyc02g061850	AtPLDδ	AT4G35790
SlPLDδ3	Solyc04g082000	AtPLDδ	AT4G35790
SlPLDζ1	Solyc01g100020	AtPLDζ2	AT3G05630
SlPLDζ1	Solyc01g100020	AtPLDζ1	AT3G16785
SlPLDδ2	Solyc02g083340	AtPLDδ	AT4G35790
SlPLDζ2	Solyc01g065720	AtPLDζ1	AT3G16785
SlPLDα3	Solyc08g066790	AtPLDα3	AT5G25370
