# Supplementary material for: Genome-Wide Investigation of the PLD Gene Family in Tomato: Identification, Analysis, and Expression
Source: MDPI journal article supplement (doi:10.3390/genes15030326), 2024-03-02
Supplement: s1 [file Table S3.xlsx]

## Sheet: Sheet1
Table S3. Syntenic gene pairs between Solanum lycopersicum and Solanum tuberosum.
Gene Name	Gene ID of Solanum lycopersicum	Gene Name	Gene ID of Solanum tuberosum
SlPLDα2	Solyc06g068090	StPLDα1	Soltu.DM.03G030690
SlPLDα2	Solyc06g068090	StPLDα3	Soltu.DM.06G023780
SlPLDβ2	Solyc08g080130	StPLDβ1	Soltu.DM.01G032650
SlPLDβ2	Solyc08g080130	StPLDβ2	Soltu.DM.08G026790
SlPLDα1	Solyc03g116620	StPLDα1	Soltu.DM.03G030690
SlPLDα1	Solyc03g116620	StPLDα3	Soltu.DM.06G023780
SlPLDβ1	Solyc01g091910	StPLDβ1	Soltu.DM.01G032650
SlPLDβ1	Solyc01g091910	StPLDβ2	Soltu.DM.08G026790
SlPLDβ1	Solyc01g091910	StPLDβ3	Soltu.DM.10G006880
SlPLDδ1	Solyc02g061850	StPLDδ2	Soltu.DM.02G005480
SlPLDδ1	Solyc02g061850	StPLDδ3	Soltu.DM.02G023290
SlPLDβ3	Solyc10g017650	StPLDβ1	Soltu.DM.01G032650
SlPLDβ3	Solyc10g017650	StPLDβ3	Soltu.DM.10G006880
SlPLDδ3	Solyc04g082000	StPLDδ3	Soltu.DM.02G023290
SlPLDδ3	Solyc04g082000	StPLDδ4	Soltu.DM.04G037130
SlPLDα5	Solyc12g011170	StPLDα6	Soltu.DM.12G028870
SlPLDζ1	Solyc01g100020	StPLDζ2	Soltu.DM.01G039740
SlPLDζ1	Solyc01g100020	StPLDζ1	Soltu.DM.01G020480
SlPLDδ2	Solyc02g083340	StPLDδ3	Soltu.DM.02G023290
SlPLDδ2	Solyc02g083340	StPLDδ2	Soltu.DM.02G005480
SlPLDζ2	Solyc01g065720	StPLDζ1	Soltu.DM.01G020480
SlPLDα3	Solyc08g066790	StPLDα4	Soltu.DM.08G015290
