# Supplementary material for: Genome-Wide Investigation of the PLD Gene Family in Tomato: Identification, Analysis, and Expression
Source: MDPI journal article supplement (doi:10.3390/genes15030326), 2024-03-02
Supplement: s1 [file Table S4.xlsx]

## Sheet: Sheet1
Table S4. List of tandem duplication gene pairs of the SlPLD gene family.
Gene Name	Gene ID of Solanum lycopersicum	Gene Name	Gene ID of Solanum lycopersicum
SlPLDα3	Solyc08g066790	SlPLDα4	Solyc08g066800
