# Supplementary material for: Genome-Wide Investigation of the PLD Gene Family in Tomato: Identification, Analysis, and Expression
Source: MDPI journal article supplement (doi:10.3390/genes15030326), 2024-03-02
Supplement: s1 [file Table S5.xlsx]

## Sheet: Sheet1
Table S5. Protein sequence list of 14 SlPLDs
Gene Name	Gene ID	Sequences
SlPLDα1	Solyc03g116620	MAPILLHGTLHVTIHEVDKLHGKQGRNFFSKIKDSVEEKVGMGKGASRIYATVDLEKARVGRTRVIENEPNNPRWYESFHIYCAHMAKNVIFTVKDNNSIGATLIGRAYLPVNDLLEGEEVDEWIEILDEDENPVEAGSKIHVTLQYFEISRDRNWGRGIGTSKYPGVPYTFFPQRTGCRVSLYHDAHIPDNFIPKIPLSGGKYYEPHRCWEDIFDAISNAKHMIYITGWSVYTEITLMRDSRREKPGGGDTVGELLKKKAKEGVKVLMLVWDDRTSVRLLKKDGLMATHDEETEEYFKDSDVHCVLCPRDPDDGGSIVKDIQTSTMFTHHQKIVIVDTVMPNGESETRRLMSFVGGLDLCDGRYDTPFHSLFRTLDTAHHDDFHQPNFAEASIDKGGP…
SlPLDα2(LePLDα11)	Solyc06g068090	MAQIQLHGTLHVTIFEVDNLQGEEEGGHFFSKIKQHFEETVGIGKGTPKLYATIDLEKARVGRTRIIENEPKNPRWYESFHIYCAHMASNVIFTIKDDNPFGASLIGRAYVPVEELLEGEEIDKWVEIMDKEMNPTAEGSKIHVKLQFFDVSRDPNWGRGIRSSRYPGVPYTFFAQRPGSRVSLYQDAHVPDNFIPKIPLSGGKYYEPHRCWEDIFDAITNAKHLIYITGWSVYTEIALVRDSRRQKPGGDIMLGELLKKKASEGVKVLMLVWDDRTSVGLLKKDGLMATHDQETEQYFQGTDVNCVLCPRNPDNGGSFVQDIQISTMFTHHQKIIVVDSALPSGELEKRRILSFVGGIDLCDGRYDTPFHSLFRTLDTAHHDDFHQPNFADGSITKGG…
SlPLDα3(LePLDα21)	Solyc08g066790	MAQFLLHGTLHVTIFEVDRLHTNFGRDFFNKVVQGIEGAIGFNKAASRLYATIDLGKARVGRTRLLDDHKNPRWYESFHIYCAHMAANVIITVKFDNPIGAEVIGRAYFPVQQLLDGEEVDEWLEILNTERKPLHGHSKIHVKLQYFDVTREYNWNRGIKVTRFPGVPYTFFRQRQGCRVTLYQDCHVPDNFIPKIPLSDGKFYKPQRCWEDIFDAVTNAKHLIYITGWSIYTEVTLIRDRRRPKPGGDISLGELLKRKANEGVRVLMLVWDDRTSIPVLQQDGLMATHDEETANYFRGTQVSCVLCPRNPDDGRSIIQNIEIGTMFTHHQKIVIVDGEMPNGDRERRRIVSYIGGLDLCDGRYDTQFHSLFRTLDTAHHDDFHQPNFTGTSIHKGGPR…
SlPLDα4(LePLDα31)	Solyc08g066800	MAQILLHGTLHVTIFEVDKLRTNFGREIFNKVVQGIEGAIGFNKTASTLYATIDLGKARVGRTRLLDEHKNPRWYESFHIYCAHMASDVVFTVKADNPIGAELIGRAYLPVEQLIVGEVVDEWLEILDTERKPVHGHSKIHVKLQYFDVTREYNWNRGIRVTRFPGVPYTFFSQRQGCKITLYQDSHVPDNFVPKIPLAGGNFYEPQRCWEDIFDAITNAKHLIYITGWSVYTEITLIRDMRRPKPGGDITLGELLKKKANEGVRVLMLVWDDRTSVPVLKEDGLMATHDQETAAYFENSEVHCVLCPRNPDDGRSIIQNIEIGTMFTHHQKIVVVDGELPNGDTERRRIVSYIGGIDLCDGRYDTQFHSLFRTLDTAHHDDFHQPNFTGASIQKGGPR…
SlPLDα5	Solyc12g011170	MLLNSTNGLSIKYNTNSHLLKDKNYLFEMVPRLLHGTLHATIYEIDKIRTGCADCCGPTSPQKLTKRVLNNVKKLFFCAPKISATKLYATIDLDKARVGRTRIAENEPSNPHWNDTFRLYCAHEVSNIIFTVKDENPVSATLIGRAYLPVEEVLNRYIVDRWVPIVDEERHPISGHSKIHVRLQFYSVKQDSNWSRGITSLAFGGLPYTFFKERQGCQVTLYPDADISDDDITNYLKSQGLFEPQRCWEDIFDAISNAKHMIYIAGWSVYTKITLIRNPRRPKVGGELTLGELLKKKASEGVNVLLLVWDDITSDEVLKRDGLMSTHDQETADYFKNTDVHCCLCPRNADSGKTVIQGFQVGTMFTHHQKTIVVDTEIPGGMSHKRMIVSFLGGIDLCD…
SlPLDβ1(LePLDβ21)	Solyc01g091910	MDNYNNYSHSYPYNTGYGYPPPPSNQPYPPPSSGAYPPLGSGAYPPPGSGAYPPQGSGAYPYPHQSPQYPPPYNTQHSGHYNYHPYPPGPSAPSAPPAPTLHHSSSFEYGYPSASPGASPPYPAHAYPPPPTSTVPTSEHQGSYHYASPQHYQHSWPERPLESQPSKVHDSLHRQDSVSSISSSGAGYDYGKDDSSTRPSAYPPIHDLVANMSLSENHPSHASPPAPASASVPSSPATYHAGPNPVPANYNAQGNIYGHPNSSFSRWEAESAKPTYPTSCAEPQNTQAMQVVPFMPSKSSLKVLLLHGNLEIWVYEAKNLPNMDMFHKTIGDMFGQMSNKITSDPYVSINIADATIGRTYVINNNENPVWMQHFNVPVAHYAAEVQFLVKDDDIVGSQL…
SlPLDβ2(LePLDβ11)	Solyc08g080130	MAHFSYSESMSGSSQHGVQVVPFKTSAGSLRVLLLHGNLDIWVREAKNLPNMDLFHKKLDNLLGGLAKLGSKKEGSPKITSDPYVTVSVSNAVVARTYVINNSENPIWMQHFYVPVAHYASEVHFVVKDNDVVGSQIIGAVGISVEQLCSGAMIEGTFPVLNSSGKPCKEGAVLTLSIQFTPMERVPLYHGGVGGDHEYQGVPGTYFPLRRGGKVTLYQDAHVPEGSLPNLWLENRVQYQHGQCWQDIFDAITQARRLIYITGWSVYHLVTLVRDNDNAEKSMLGEILKRKSQEGVRVLLLIWDDPTSKSILGYKTEGIMGTNDEETRRYFKHSSVQVLLCPRSAGKGHSWAKKQETETIYTHHQKTVILDADAGNYQRKIMAFVGGLDLCKGRYDTPA…
SlPLDβ3	Solyc10g017650	PMLICLSRWMDNNNNNKSSSSPTYPYNTAPPPPTNQASYNYPSNNSSPYPPPGSVPYPYPPYLHYHPPPYAVQQSGHVNYNNYPQVPPASPSETTRTRPQQTNPPLEYSNYPPPSHIVHSPYSYHAYYPPPPPPTISSSRPVLQQQGSFQYGSSQGLLERQTSKGHDQSPSLQHQNSLSSVTSSAASSLSGVSSSLASSDHGKNGPIDDHLANVHLYENPAPATAPASCHSGPRPHVANNYNARGTIYGHPNASFSKGEASSVVQSEPCHRPTHSRTSSGELQNNWGMQVMPFIASKNVLLLHGNLDIWAFEARNLPNMDVFHKTIGDMFNKMGNNGQLGNMTSDPYVTIILAGAVIGRTYVINNNENPVWMQHFNVPVAHYASDVQFLVKDNDMVGSQ…
SlPLDδ1	Solyc02g061850	MSEPKTIILHGDLQLHIIEARHLPNFDITSDRLRRCFTFGGICGKPHHSTVERAGGDHRSDKKDHHRRIITSDPYVTVSAPQTALARTRVISNSQYPFWDEHFRIPLAHPLAYLEFRVKDDDLFGAEIMGKVKIPAERIATGEDISDWFQIIGSSSKPDTALRVQMKFYPYEKNSLYKQGIASDPQYLGVRNSYFPVRKGSSVKLYQDAHVSNNVKFPEIKLENGTNFEHNKCWEDICYAIAEAHHLIYIVGWSVFHKIKLIREPTRPLPRGGDLTLGELLKYKSQEGVRVLLLLWDDKTSHDKFFITTEGLMGTHDEETKKFFKHSSVICVLSPRYASSKLSIMKQQVVGTMFTHHQKCILVDTQAPGNNRKITAFLGGLDLCDGRYDTPEHRLFRDL…
SlPLDδ2	Solyc02g083340	MAENSSQENFICLHGDLELHIIQARHLPNMDLTSERIRRCFTACDVCRKPQTGSTADDGNGELPNVKSTDQKIHHRSIITSDPYVAVCAPHTALARTRVIPNSQNPVWDEHFRIPLAHPMDCLDFRVKDDDVFGAQVMGKVTIPAEKIASGEVVSGWFPVIGASGKSPKPDTALRLWMKFVPYDTNPLYKRGIASDPQYLGVRNTYFPLRKGSSVKLYQDAHVSDKFKLPEIQLENNTTFEHNKCWEDICYAITEAHHLIYIVGWSVFHKVKLVREPTRPLPRGGDLTLGELLKYKSQEGVRVLLLVWDDKTSHDKFFINTAGVMGTHDEETRKFFKHSSVICVLSPRYASSKLSLIKQQVVGTMFTHHQKCVLVDTQAPGNNRKVTAFLGGLDLCDGR…
SlPLDδ3	Solyc04g082000	MADENCENVVYLHGDFDLKIIEARRLPNMDLVTERLSRCFTALDICRKPFTRRRRKGHRRKIITSDPYVTVCLTGATVARTRVISNCQDPVWNEHFKIPLAHPVSVVEFLVKDNDVFGADYIGVATVLAEKIKSGELIDDWFPIIGPYGKPPKPDCAIRLQMRFIHCDGNPSYNGGISEDFGLKASYFPVRHGGSVTLYQDAHVPDGMLPEIKLDDDKIFEHSKCWEDICHAILEAHHLVYVVGWSIFHKVKLVREPSKPLPSGGDLTLGELLKYKSEEGVRVLLLVWDDKTSHSKFFIQTDGVMQTHDEETRKFFKHSSVNCVLAPRYASSKLSIFKQQVVGTLYTHHQKCVIVDTQASGNNRKVSAFLGGLDLCDGRYDTPEHRLFRDLDTVFKDDF…
SlPLDδ4	Solyc10g024370	MAGKPCMDSPGGAILLHGELDVQIIEAKSLPNMDMACCSKFSPFGSTRKAKNKDPGKSGTRKIIDTSDPYVSVVIGGAKVARTTVIRNDENPSWNEHVRIPVAHTVDKVEFFVKDNDGVGAELIGKVEIPADKIVAGKEINSWFSILGHSGDPLKTGAQLHLSIQYKPVAENPLYRNGVGRDTNSVGVPHTYFPLRRGGNLTLYQDAHVPDAALPKIWLDDGKVFSHNKCWEDICHSMLEAKYLIYVVGWSVYHPIRLVREPTRPLPSAGERTLGDLLKYKSQEGVRVILLIWDDKTSNDDVFLKTEGVMQTHDEETRKFFKHSSVHCVLCPRSASSKLSILKRQIVGNLFTHHQKCVLVDTEAPQNERKITAFVGGLDLCDGRYDTPEHRLFSDLDTV…
SlPLDζ1	Solyc01g100020	MSTDKLIENAPASAMSSTHSLRYYTEPATIFEELPKATIIGVSRPDASDISPLLLSYTIEVQYKQFKWCLLKKASQVIYLHFALRRRAIIEEFHEKQEQVKEWLHHIGIGEQTAVTQDDDEDDGALPIYNEDSIRNRCVPSRAALSIIRPSLGKQQTITRKAKIAMQEYLNHFMGNLDIVNSREVCKFLEVSKLSFSPEYGPKLKENYVMVKHLSTVPIEEENVGCCICYWSGCCKSKWQKVWAVLKPGYLALLNNPFDAKLLDIIVFDVLPTSNVKGENAVCLAAEIRERNPLQYAFKVCCGNRSIRIRTTSHAKVDEWICSINDAVLKPPEGWCNPHRFGSFAPLRGTTDDAAQAQWFVDGKAAFEAIASSIESAKSEIYITGWWLCPELYLRRPFH…
SlPLDζ2	Solyc01g065720	MEQLTIGDGPRYVQMQSEPEASTLSSLYSFHQDTATRIFDELPQATIIQVSRSDAGDISPMLLTYTIEVQYKQFKWQLVKKASHVIYLHFALKKRAFIEEIHEKQEQVKEWLQNLGIGDHTTVMQDEDEPDDEASPMRAEESAKNRDVPSSAALPIIRPTLGRQHSMSDRAKNAMQGYLNHFLGNIDIVNSQEVCRFLEVSRLSFSPEYGPKLKEDYIMVKHLPKIQRDDDSRKCCSCQWFGCCKDNWQKVWAVLKPGFLAFLKDPCDPEPLDIIVFDVLPASDGNGEGRVSLAKEIKDGNPLRHYFRVSCGSRCIKLRTKSDAKVKDWVAAINDAGLRPPEGWCHPHRFGSYAPPRGLTEDGSQAQWFVDGESAFEAIALAIEEAKSEIFICGWWLCP…
1The gene name was quoted from Laxalt et al.[32].
