# Supplementary material for: Genome-Wide Investigation of the PLD Gene Family in Tomato: Identification, Analysis, and Expression
Source: MDPI journal article supplement (doi:10.3390/genes15030326), 2024-03-02
Supplement: s1 [file Table S6.xlsx]

## Sheet: Sheet1
Table S6. List of 10 motifs with basic information
motif	E-value	Sites	Width
1	2.1e-474	14	50
2	1.2e-388	12	50
3	2.9e-359	14	50
4	1.4e-272	14	29
5	1.6e-324	12	50
6	7.1e-301	12	50
7	1.5e-233	14	29
8	1.3e-267	14	41
9	4.2e-225	12	50
10	2.2e-191	12	29
