# Supplementary figures and images for: Genome-Wide Investigation of the PLD Gene Family in Tomato: Identification, Analysis, and Expression
Source: MDPI journal article supplement (doi:10.3390/genes15030326), 2024-03-02

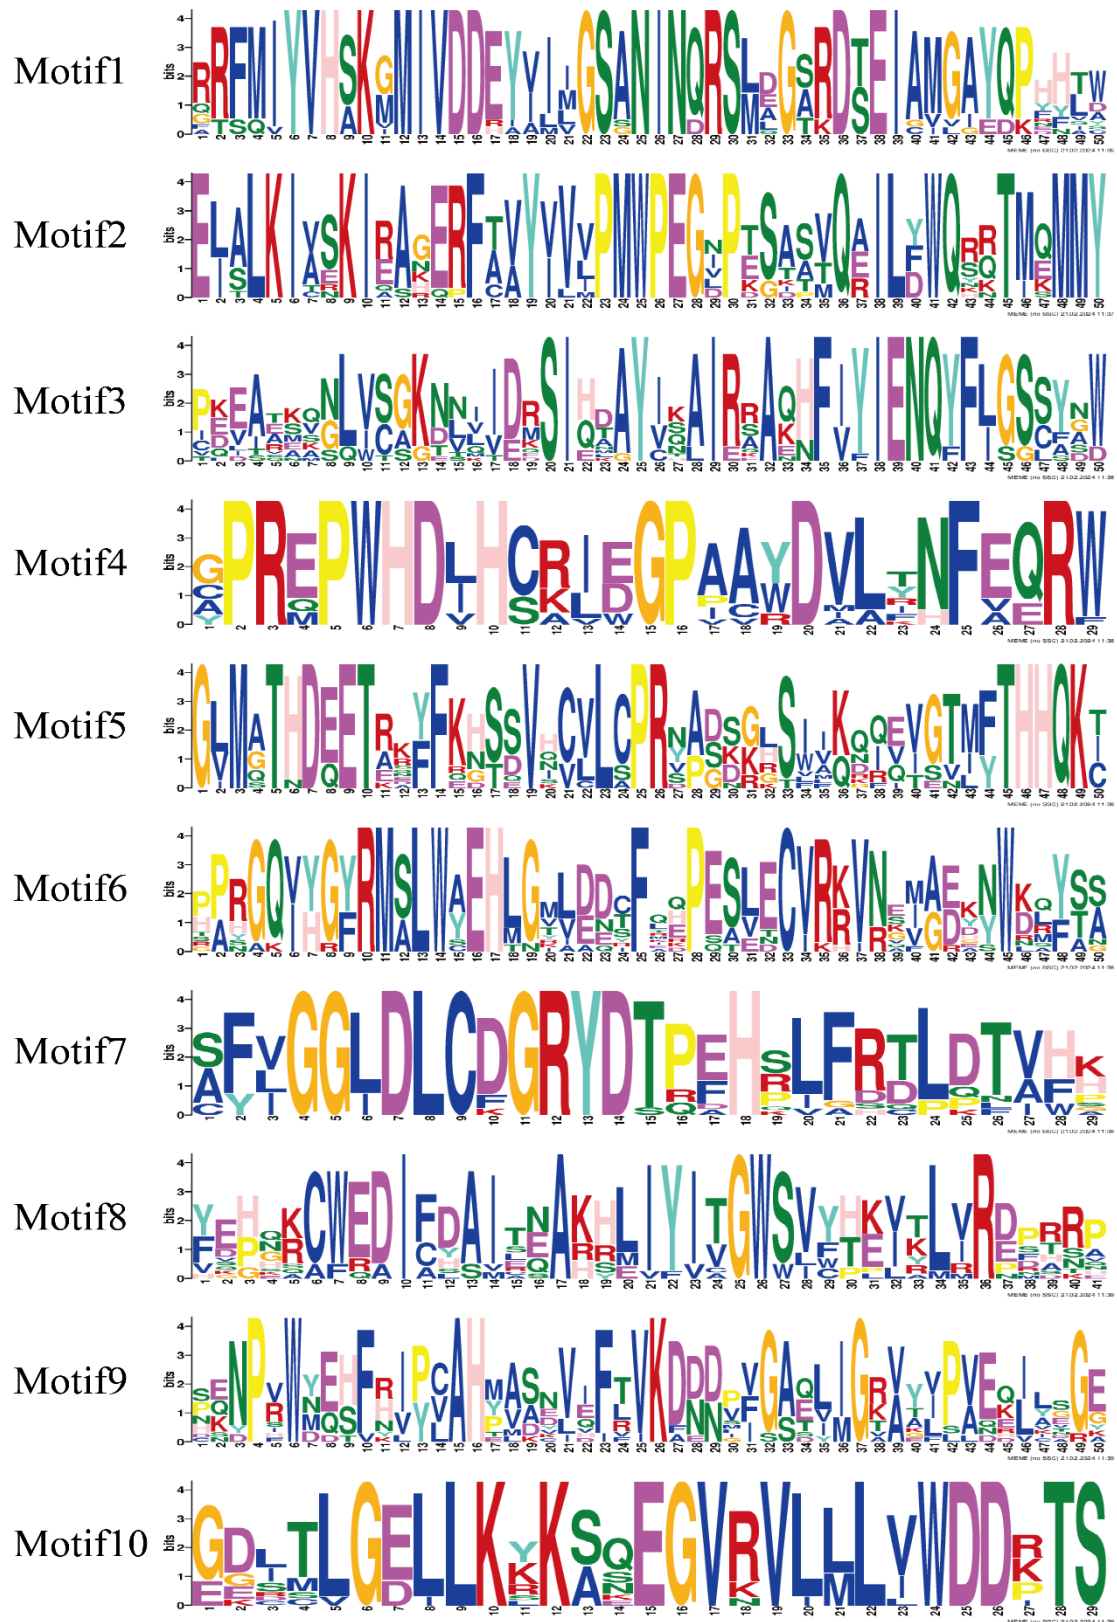

**Figure S2.** Logos of 10 motifs in tomato.

Supplement: s1 [file s1]
